# Supplementary material for: Metabolic response of lettuce (Lactuca sativa L.) to polystyrene nanoplastics and microplastics after foliar exposure
Source: Royal Society of Chemistry journal article supplement (doi:10.1039/d4en00233d), 2024-01-01
Supplement: d4en00233d1.pdf [file d4en00233d1.pdf]

**Supporting information of**

**Metabolic response of lettuce (*Lactuca sativa* L.) to foliar exposed polystyrene  
nanoplastics and microplastics**

Min Li<sup>a,b</sup>, Jing-Han Wei<sup>a</sup>, Bing-Ke Wei<sup>a</sup>, Zi-Qi Chen<sup>a</sup>, Hai-Long Liu<sup>a,\*</sup>, Wan-Ying Zhang<sup>b</sup>, Xin-Yu  
Li<sup>b,\*</sup>, and Dong-Mei Zhou<sup>c</sup>

<sup>a</sup> College of Environmental Science and Engineering, Yangzhou University, Yangzhou, 225000, China

<sup>b</sup> State Environmental Protection Engineering Center for Urban Soil Contamination Control and Remediation,  
Shanghai Academy of Environmental Sciences, Shanghai 200233, P. R. China

<sup>c</sup> State Key Laboratory of Pollution Control and Resource Reuse, School of the Environment, Nanjing University,  
Nanjing, 210023, China

### **Text S1 Determination of SOD and CAT activities and MDA concentration**

After grinding in liquid nitrogen, fresh leaves were homogenized in ice-cold phosphate buffer (50 mM, pH 7.8) and centrifugated (4 °C, 10,000×g) for 10 min. Next, the supernatant was collected for determining SOD, CAT, and MDA. These three indexes were measured according to the instructions of assay kits provided by Keming Biotechnology Co., Ltd. (Suzhou, China).

SOD can inhibit the photochemical reduction of nitroblue tetrazolium (NBT). One unit of SOD activity (U) was defined as the amount of enzyme that caused a 50% decrease in the SOD-inhibited NBT reduction. Specifically, an aliquot of sample supernatant ( $V_t$ ) was added into tubes (referred as sample tube) which containing reaction mixture, i.e., phosphate buffer, methionine, ethylenediaminetetraacetic acid, NBT, and xanthine. In control and blank tubes, Milli-Q water, instead of supernatant, was added into the reaction mixture. Next, the blank tubes were stored in dark for 15 min whereas other tubes were irradiated under light for 15 min. Finally, the absorbance of all solutions was measured at 560 nm using a spectrophotometer. The SOD activity was calculated according to the equation as follows:

$$SOD\ activity\ (U\ g^{-1}) = \frac{(A_{CK} - A_E) \times V}{0.5 \times A_{CK} \times W \times V_t} \quad (1)$$

Where  $A_{CK}$  and  $A_E$  are the absorbance of control and sample solution at 560 nm, respectively;  $V$  is the total volume of sample solution (mL);  $W$  is the fresh weight of lettuce leave sample (g);  $V_t$  is the supernatant volume used to determination (mL).

CAT activity was determined by following the consumption of  $H_2O_2$  at 240 nm. One unit of CAT activity (U) was defined as the amount of enzyme catalyzing the decomposition of 1 nmol of  $H_2O_2$  per min. Specifically, 10  $\mu$ L of supernatant was mixed thoroughly with 190  $\mu$ L reaction mixture, which containing  $H_2O_2$  and phosphate buffer. Afterwards, the absorbance of solutions was measured

at 240 nm at 0 ( $A_1$ ) and 1 min ( $A_2$ ). The CAT activity was calculated according to the equation as follows:

$$CAT \text{ activity } (nmol \text{ min}^{-1} g^{-1}) = \frac{(A_1 - A_2) \times 918}{W} \quad (2)$$

Where W is the fresh weight of lettuce leave sample (g).

Thiobarbital acid (TBA) colorimetric method was applied to measure the MDA content. MDA can react with TBA to produce a red product with a maximum absorption peak at 532 nm. To measure MDA content, an aliquot of sample supernatant was added into the reaction mixture consisted of trichloroacetic acid and thiobarbituric acid. The obtained mixture was then reacted for 30 min in a boiling water bath (90 °C). After cooling, the mixture was centrifuged at 10,000×g for 10 min at 25 °C. Afterwards, the absorbance of supernatants was measured at 532 nm ( $A_{532}$ ) and 600 ( $A_{600}$ ) nm. The MDA content was calculated according to the equation as follows:

$$MDA \text{ content } (nmol \text{ g}^{-1}) = \frac{[6.432 \times (A_{532} - A_{600}) - 0.559 \times A_{450}] \times V_t}{V_s \times W} \quad (3)$$

Where  $A_{450}$  is the absorbance of supernatants at 450 nm;  $V_t$  is the total volume of sample solution (mL);  $V_s$  is the supernatant volume used to determination (mL); W is the fresh weight of lettuce leave sample (g).

## **Text S2**

### **Determination of soluble protein, soluble sugar, ascorbic acid, and nitrate in lettuce leaves**

**Soluble protein:** The fresh lettuce leaves were rapidly frozen with liquid nitrogen. After grinding, 0.2 g of fresh lettuce leaves were extracted with 2 mL of extraction solution. The obtained extracts were centrifuged (8000 g, 4 °C) for 10 min. Next, the supernatant was collected to determine the soluble protein content according to Coomassie brilliant blue method.

**Soluble sugar:** 0.1 g of fresh lettuce leaves were homogenized in 1 mL of Milli-Q water. The obtained homogenate was bathed in water at 95 °C for 10 min, cooled, and centrifuged (8000 g, 25 °C) for 10 min. Next, the supernatant was collected to determine the content of soluble sugar according to anthrone colorimetric method.

**Ascorbic acid:** 0.1 g of fresh lettuce leaves were homogenized in 1 mL of ice-cold extraction solution. Next, the obtained homogenate was centrifuged (8000 g, 4 °C) for 20 min. The supernatant was collected to determine the content of ascorbic acid according to 2, 6-dichlorophenol sodium indigophenol titration method

**Nitrate:** 0.1 g of fresh lettuce leaves were homogenized in 1 mL of Milli-Q water. The obtained homogenate was shaken in a constant temperature oscillation chamber at 90 °C for 30 min, cooled, and centrifuged (12000 g, 25 °C) for 15 min. Next, the supernatant was collected to determine the content of nitrate nitrogen according to salicylic acid method. The nitrate content was calculated by multiplying nitrate nitrogen by 4.4.

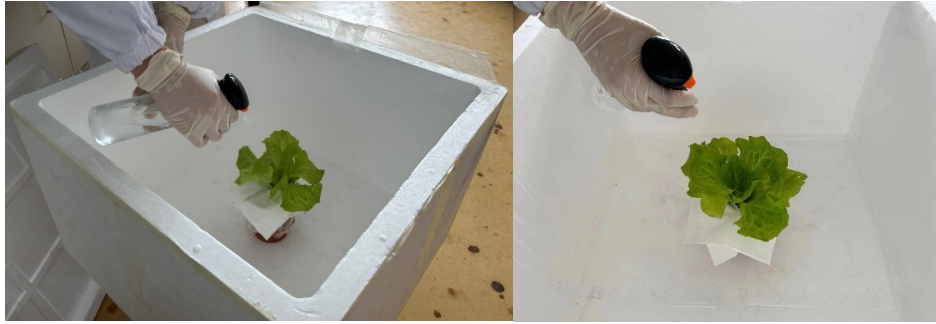

**Figure S1** Images of lettuce spraying detail

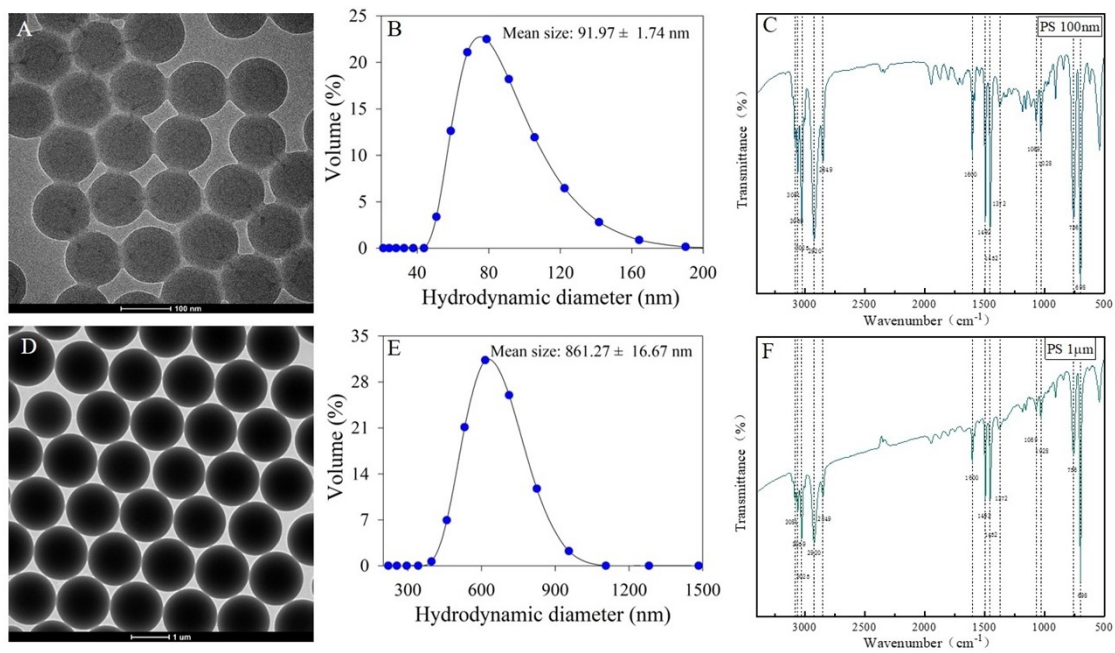

**Figure S2** Transmission electron microscopy images (A and D) and dynamic light scattering particle size distribution (B and E), as well as Fourier transform infrared spectrograms (C and F) of PS NPs (A-C) and PS MPs (D-F).

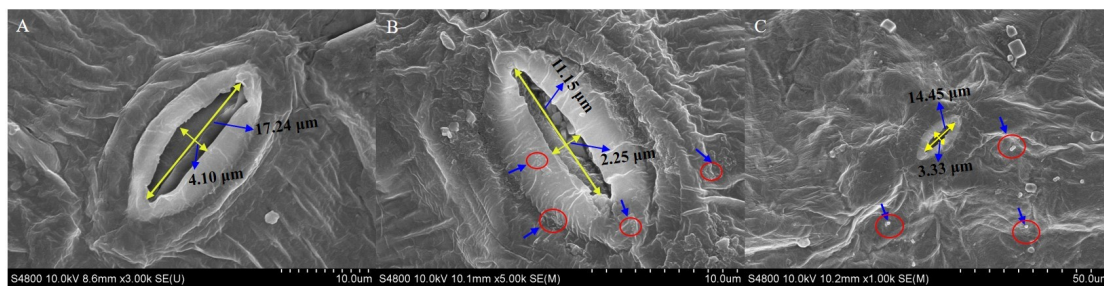

**Figure S3** Scanning electron microscope images of lettuce leaf surface from CK (A), NP-HC (B), and MP-HC treatments (C).

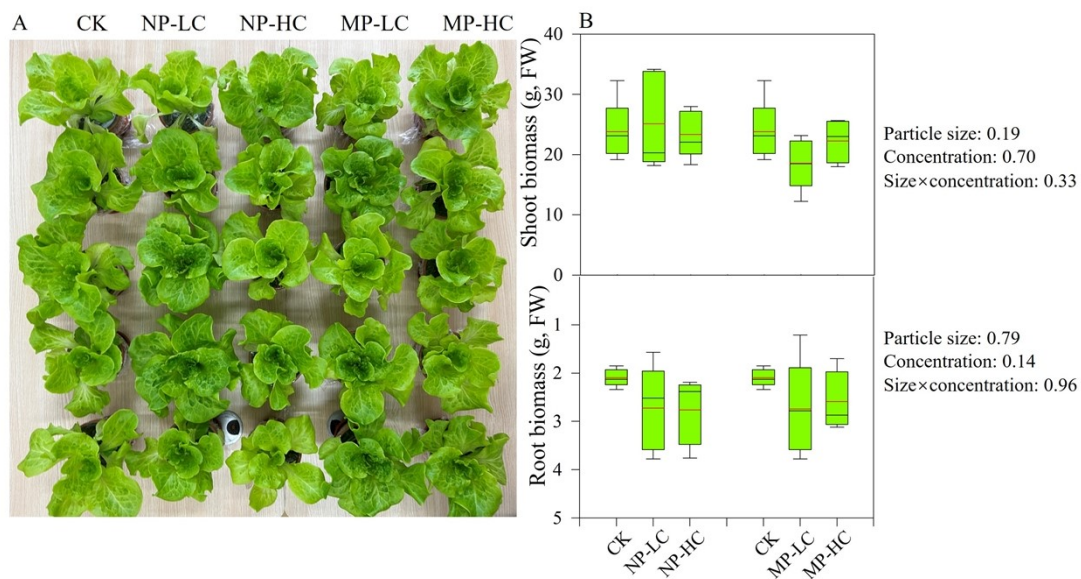

**Figure S4** Lettuce morphology after PS exposure (A) and the effects of PS on the fresh biomass of lettuce leaves and roots (B). The lettuce was foliar exposed to Milli-Q water (control, CK), 100 nm PS at a low concentration of 3.5 mg L<sup>-1</sup> (NP-LC) and a high concentration of 35.0 mg L<sup>-1</sup> (NP-HC), 1 μm PS at a low concentration of 3.5 mg L<sup>-1</sup> (MP-LC) and a high concentration of 35.0 mg L<sup>-1</sup> (MP-HC). The red and black lines in the box plot represent the mean and median values, respectively. The effects of PS particle size, concentration, and their interactions are analyzed by two-way analysis of variance and the F values are presented in the test. Data are presented as mean ± SD (n = 5).



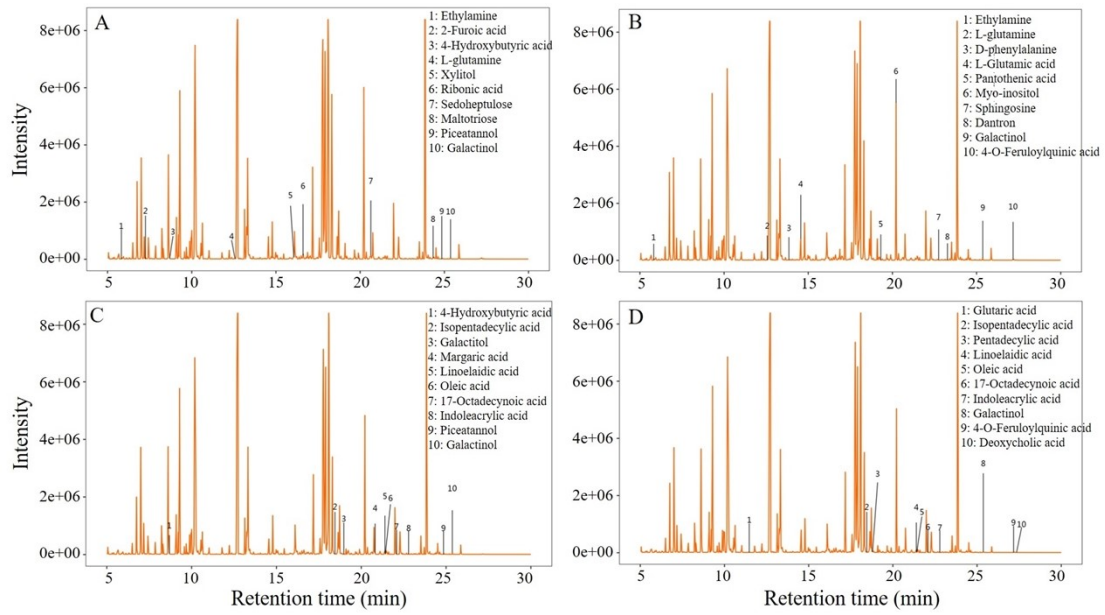

**Figure S5** The total ion chromatogram of metabolites in lettuce leaves in NP-LC (A), NP-HC (B), MP-LC (C), and MP-HC (D) treatments. The number represents the top 10 metabolites which were selected based on VIP values ( $VIP > 1$ ). The lettuce was foliar exposed to 100 nm PS at a low concentration of  $3.5 \text{ mg L}^{-1}$  (NP-LC) and a high concentration of  $35.0 \text{ mg L}^{-1}$  (NP-HC), 1  $\mu\text{m}$  PS at a low concentration of  $3.5 \text{ mg L}^{-1}$  (MP-LC) and a high concentration of  $35.0 \text{ mg L}^{-1}$  (MP-HC).

**Table S1 The data related to the calculation of capture rate.**

| Replicates | Total spraying volume (mL) | The volume wasted in the plastic box (mL) | Capture rate (%) | Average of capture rate (%) | SD of capture rate (%) |
|------------|----------------------------|-------------------------------------------|------------------|-----------------------------|------------------------|
| 1          | 6.10                       | 3.28                                      | 46.29            | 41.57                       | 3.61                   |
| 2          | 3.80                       | 2.37                                      | 37.51            |                             |                        |
| 3          | 6.70                       | 3.96                                      | 40.92            |                             |                        |

**Table S2 The properties of artificial soil used in this study. Data are given as mean  $\pm$  SD (n = 3).**

| pH              | OM (g kg <sup>-1</sup> ) | WHC (%)          | CEC (cmol kg <sup>-1</sup> ) |
|-----------------|--------------------------|------------------|------------------------------|
| 5.40 $\pm$ 0.02 | 44.96 $\pm$ 3.15         | 46.83 $\pm$ 5.36 | 15.94 $\pm$ 0.76             |

**Table S3** Effects of PS NPs and PS MPs foliar exposure on the concentration of chlorophyll a, chlorophyll b, total chlorophyll, and nitrate, as well as catalase activity in lettuce leaves. Data are presented as mean  $\pm$  SD (n = 5).

| Particle size               | Concentration | Chlorophyll a<br>(mg kg <sup>-1</sup> ) | Chlorophyll b<br>(mg kg <sup>-1</sup> ) | Total<br>chlorophyll<br>(mg kg <sup>-1</sup> ) | Catalase activity<br>(nmol min <sup>-1</sup> g <sup>-1</sup> ) | Nitrate<br>(mg kg <sup>-1</sup> ) |
|-----------------------------|---------------|-----------------------------------------|-----------------------------------------|------------------------------------------------|----------------------------------------------------------------|-----------------------------------|
| Nanoplastics                | CK            | 0.55 $\pm$ 0.09a                        | 0.26 $\pm$ 0.04a                        | 0.80 $\pm$ 0.11a                               | 18.39 $\pm$ 2.05a                                              | 1712.31 $\pm$ 109.27a             |
|                             | LC            | 0.54 $\pm$ 0.05a                        | 0.22 $\pm$ 0.01a                        | 0.76 $\pm$ 0.06a                               | 25.36 $\pm$ 3.53b                                              | 1856.80 $\pm$ 56.30a              |
|                             | HC            | 0.41 $\pm$ 0.03b                        | 0.18 $\pm$ 0.01b                        | 0.60 $\pm$ 0.05b                               | 93.76 $\pm$ 2.36c                                              | 1189.70 $\pm$ 129.63b             |
| Microplastics               | CK            | 0.55 $\pm$ 0.09a                        | 0.26 $\pm$ 0.04a                        | 0.80 $\pm$ 0.11a                               | 18.39 $\pm$ 2.05a                                              | 1712.31 $\pm$ 109.27a             |
|                             | LC            | 0.60 $\pm$ 0.03a                        | 0.25 $\pm$ 0.01a                        | 0.85 $\pm$ 0.03a                               | 14.16 $\pm$ 0.55b                                              | 1630.84 $\pm$ 89.26a              |
|                             | HC            | 0.31 $\pm$ 0.06b                        | 0.15 $\pm$ 0.01b                        | 0.46 $\pm$ 0.06b                               | 18.81 $\pm$ 2.12a                                              | 1279.40 $\pm$ 95.99b              |
| Particle size               |               | 1.81                                    | 0.51                                    | 1.80                                           | 1183.84***                                                     | 1.43                              |
| Concentration               |               | 38.30***                                | 50.44***                                | 54.75***                                       | 884.12***                                                      | 78.97***                          |
| Size $\times$ concentration |               | 6.09**                                  | 7.15**                                  | 8.29**                                         | 782.12***                                                      | 6.55**                            |

Note: LC and HC mean PS exposure at a low concentration of 3.5 mg L<sup>-1</sup> and a high concentration of 35.0 mg L<sup>-1</sup>, respectively. Different lowercase letters represent significant differences among treatments with the same particle size as revealed by two-way ANOVA followed by Bonferroni paired comparison. The results of two-way ANOVA are shown in the text. \*\* and \*\*\* mean significant effects at  $p < 0.01$  and  $p < 0.001$ , respectively.

**Table S4** Effects of PS NPs and PS MPs foliar exposure on superoxide dismutase (SOD) activity and the concentration of malonaldehyde (MDA), soluble protein, soluble sugar, and ascorbic acid in lettuce leaves. Data are presented as mean  $\pm$  SD (n = 5).

| Concentration               | SOD activity<br>(U g <sup>-1</sup> ) | MDA<br>concentration<br>(nmol g <sup>-1</sup> ) | Soluble protein<br>(mg g <sup>-1</sup> ) | Soluble sugar<br>(mg g <sup>-1</sup> ) | Ascorbic acid<br>(mg kg <sup>-1</sup> ) |
|-----------------------------|--------------------------------------|-------------------------------------------------|------------------------------------------|----------------------------------------|-----------------------------------------|
| CK                          | 324.50 $\pm$ 24.41a                  | 4.64 $\pm$ 0.66a                                | 13.38 $\pm$ 1.55a                        | 8.47 $\pm$ 1.05a                       | 92.05 $\pm$ 11.84a                      |
| LC                          | 270.31 $\pm$ 34.32b                  | 6.14 $\pm$ 0.59b                                | 16.55 $\pm$ 1.51b                        | 8.64 $\pm$ 1.04a                       | 101.31 $\pm$ 15.74a                     |
| HC                          | 255.00 $\pm$ 23.52b                  | 7.43 $\pm$ 1.06c                                | 18.56 $\pm$ 2.36c                        | 11.39 $\pm$ 2.20b                      | 96.00 $\pm$ 9.16a                       |
| Particle size               | 2.41                                 | 1.75                                            | 1.64                                     | 4.10                                   | 4.07                                    |
| Concentration               | 18.29***                             | 31.75***                                        | 23.00***                                 | 14.51***                               | 1.73                                    |
| Size $\times$ concentration | 1.16                                 | 1.32                                            | 2.72                                     | 3.10                                   | 2.95                                    |

Note: LC and HC mean PS exposure at a low concentration of 3.5 mg L<sup>-1</sup> and a high concentration of 35.0 mg L<sup>-1</sup>, respectively. The data presented in the table are the mean and SD values of all CK, LC treatments (including NP-LC and MP-LC treatments), and HC treatments (including NP-LC and MP-LC treatments), respectively. Different lowercase letters represent significant differences among treatments by two-way ANOVA followed by Bonferroni paired comparison. The results of two-way ANOVA are shown in the text. \*\*\* means significant effects at  $p < 0.001$ .

**Table S5** The detailed information of metabolites with significant difference selected by PLS-DA (VIP > 1) and t-test ( $p < 0.05$ ) in lettuce leaves upon exposure to PS NPs.

| NP-LC vs CK                |      |                 | NP-HC vs CK             |      |                 |
|----------------------------|------|-----------------|-------------------------|------|-----------------|
| Metabolites                | VIP  | <i>p</i> -value | Metabolites             | VIP  | <i>p</i> -value |
| P-Hydroxyphenylacetic Acid | 1.24 | 0.0073          | Galactinol              | 2.94 | 0.0002          |
| 3-Hydroxyphenylacetic Acid | 1.32 | 0.0029          | Pantothenic Acid        | 2.37 | 0.0000          |
| Myo-Inositol               | 1.44 | 0.0002          | 4-O-Feruloylquinic Acid | 2.35 | 0.0052          |
| Quinic Acid                | 1.21 | 0.0017          | Myo-Inositol            | 2.34 | 0.0000          |
| Ethylamine                 | 2.38 | 0.0006          | Ethylamine              | 2.27 | 0.0071          |
| Sphingosine                | 1.70 | 0.0002          | Sphingosine             | 2.23 | 0.0050          |
| L-Glutamine                | 2.38 | 0.0000          | L-Glutamine             | 2.12 | 0.0048          |
| D-Phenylalanine            | 1.69 | 0.0002          | D-Phenylalanine         | 2.02 | 0.0126          |
| DL-Pyroglutamic Acid       | 1.26 | 0.0010          | L-Glutamic Acid         | 2.02 | 0.0016          |
| Beta-Alanine               | 1.22 | 0.0045          | Dantron                 | 1.93 | 0.0003          |
| L-Glutamic Acid            | 1.20 | 0.0064          | 3-Hydroxybenzoic Acid   | 1.91 | 0.0000          |
| L-Alanine                  | 1.11 | 0.0017          | Deoxycholic Acid        | 1.88 | 0.0142          |
| Dantron                    | 1.27 | 0.0059          | Galactitol              | 1.81 | 0.0142          |
| Meso-Tartrate              | 1.12 | 0.0010          | Galactose 1-Phosphate   | 1.76 | 0.0137          |
| Maltotriose                | 1.92 | 0.0000          | Xylitol                 | 1.72 | 0.0053          |
| Xylitol                    | 1.92 | 0.0001          | D-Threonic Acid         | 1.72 | 0.0006          |
| Ribonic Acid               | 1.91 | 0.0087          | Maltotriose             | 1.70 | 0.0043          |
| Galactose 1-Phosphate      | 1.87 | 0.0025          | N-Acetylmannosamine     | 1.61 | 0.0003          |
| Isomaltose                 | 1.80 | 0.0036          | Beta-Lactose            | 1.59 | 0.0168          |
| Beta-Lactose               | 1.74 | 0.0003          | Melibiose               | 1.56 | 0.0025          |
| L-Fucitol                  | 1.73 | 0.0126          | D-(+)-Mannose           | 1.54 | 0.0001          |
| DL-Glyceric Acid           | 1.69 | 0.0000          | D-Tagatose              | 1.53 | 0.0003          |
| D-Arabitol                 | 1.67 | 0.0001          | DL-Glyceric Acid        | 1.48 | 0.0001          |
| D-Threonic Acid            | 1.65 | 0.0001          | D-Arabitol              | 1.43 | 0.0014          |
| N-Acetylmannosamine        | 1.65 | 0.0001          | 1,5-Anhydrosorbitol     | 1.43 | 0.0003          |
| Glucose                    | 1.63 | 0.0000          | L-Fucitol               | 1.39 | 0.0441          |
| 2-Ketoglucose              | 1.59 | 0.0419          | Glutaric Acid           | 1.38 | 0.0001          |
| D-Glucose                  | 1.43 | 0.0000          | 4-Hydroxybutyric Acid   | 1.38 | 0.0412          |
| D-Lyxose                   | 1.41 | 0.0002          | 17-Octadecynoic Acid    | 1.38 | 0.0194          |
| 1-Deoxy-D-Glucitol         | 1.36 | 0.0026          | Margaric Acid           | 1.36 | 0.0406          |
| D-Xylose                   | 1.35 | 0.0006          | Oleic Acid              | 1.36 | 0.0077          |
| D-(+)-Mannose              | 1.23 | 0.0043          | Isopentadecylic Acid    | 1.35 | 0.0107          |
| D-Tagatose                 | 1.16 | 0.0008          | Pentadecylic Acid       | 1.34 | 0.0198          |
| Fructose                   | 1.15 | 0.0000          | Caproic Acid            | 1.34 | 0.0019          |
| L-Lyxulose                 | 1.14 | 0.0022          | Myristic Acid           | 1.30 | 0.0003          |
| Erythritol                 | 1.07 | 0.0030          | Lactitol                | 1.28 | 0.0163          |
| Sucrose                    | 1.07 | 0.0009          | Leucrose                | 1.27 | 0.0334          |
| 1,5-Anhydrosorbitol        | 1.04 | 0.0247          | 2-Furoic Acid           | 1.26 | 0.0002          |
| Formamide                  | 1.15 | 0.0107          | Erythrono-1,4-Lactone   | 1.25 | 0.0090          |
| D-Xylono-1,5-Lactone       | 1.62 | 0.0000          | Dehydroascorbic Acid    | 1.23 | 0.0411          |

|                                    |      |        |                                        |      |        |
|------------------------------------|------|--------|----------------------------------------|------|--------|
| Succinic Acid                      | 1.19 | 0.0006 | Indoleacrylic Acid                     | 1.23 | 0.0072 |
| Pgf2alpha                          | 1.40 | 0.0002 | Linoelaidic Acid                       | 1.22 | 0.0006 |
| 4-Hydroxybutyric Acid              | 2.53 | 0.0000 | 6-Hydroxyhexanoic Acid                 | 1.21 | 0.0155 |
| Daminozide                         | 1.26 | 0.0063 | Glycerol 1-Myristate                   | 1.20 | 0.0266 |
| D-(-)-Citramalic Acid              | 1.07 | 0.0066 | Methylphosphate                        | 1.19 | 0.0149 |
| Lactitol                           | 1.39 | 0.0041 | Nicotinic Acid                         | 1.19 | 0.0017 |
| 2-Furoic Acid                      | 1.90 | 0.0043 | Uracil                                 | 1.19 | 0.0001 |
| Dehydroascorbic Acid               | 1.45 | 0.0001 | Thymine                                | 1.18 | 0.0002 |
| Erythrono-1,4-Lactone              | 1.15 | 0.0026 | 2-Hydroxyglutaric Acid                 | 1.18 | 0.0344 |
| Oxoglutaric Acid                   | 1.24 | 0.0027 | Isocitric Acid                         | 1.17 | 0.0079 |
| Linoelaidic Acid                   | 1.35 | 0.0480 | Triacetin                              | 1.17 | 0.0005 |
| 6-Hydroxyhexanoic Acid             | 1.89 | 0.0003 | Piceatannol                            | 1.16 | 0.0017 |
| Glycerol 1-Myristate               | 1.43 | 0.0402 | Ethyl-Alpha-D-Glucopyranoside          | 1.14 | 0.0117 |
| Tyramine                           | 1.05 | 0.0046 | 2-Ketobutyric Acid                     | 1.13 | 0.0058 |
| 2-Hydroxyglutaric Acid             | 1.25 | 0.0011 | Beta-Mannosylglycerate                 | 1.12 | 0.0019 |
| Triacetin                          | 1.21 | 0.0011 | Sedoheptulose                          | 1.11 | 0.0020 |
| Galactinol                         | 3.17 | 0.0004 | 5-Methyluridine                        | 1.11 | 0.0015 |
| Piceatannol                        | 2.10 | 0.0066 | Tartaric Acid, Ethyl Ester             | 1.10 | 0.0068 |
| Sedoheptulose                      | 1.97 | 0.0000 | Mannobiose                             | 1.09 | 0.0135 |
| Tartaric Acid, Ethyl Ester         | 1.89 | 0.0091 | Conduritol-Beta-Epoxyde                | 1.09 | 0.0261 |
| D-Fucitol                          | 1.72 | 0.0000 | 3-(3-Hydroxyphenyl)Propanoic Acid      | 1.08 | 0.0027 |
| Beta-Mannosylglycerate             | 1.67 | 0.0235 | 2-Hydroxycyclohexane-1-Carboxylic Acid | 1.06 | 0.0176 |
| 5-Methyluridine                    | 1.54 | 0.0423 | 5-Methylimidazolidine-2,4-Dione        | 1.05 | 0.0170 |
| Ethyl-Alpha-D-Glucopyranoside      | 1.47 | 0.0005 | 5,5-Dimethylhydantoin                  | 1.04 | 0.0022 |
| Conduritol-Beta-Epoxyde            | 1.39 | 0.0003 | 1-C-Octylhexopyranose                  | 1.04 | 0.0153 |
| 1-C-Octylhexopyranose              | 1.18 | 0.0029 | 2,3,4-Tri-O-Methyl-D-Galactopyranose   | 1.04 | 0.0075 |
| D-Fructose                         | 1.18 | 0.0000 | D-Fucitol                              | 1.02 | 0.0352 |
| 2,3,4,5-Tetrahydroxypentanoic Acid | 1.14 | 0.0027 | Furfuryl Alcohol                       | 1.01 | 0.0082 |
| Levoglucozan                       | 1.09 | 0.0369 | 5-Methylpyrrolidin-2-One               | 1.01 | 0.0095 |

**Table S6** The detailed information of metabolites with significant difference selected by PLS-DA(VIP > 1) and t-test ( $p < 0.05$ ) in lettuce leaves upon exposure to PS MPs.

| MP-LC vs CK               |      |                | MP-HC vs CK                   |      |                |
|---------------------------|------|----------------|-------------------------------|------|----------------|
| Metabolites               | VIP  | <i>p</i> value | Metabolites                   | VIP  | <i>p</i> value |
| 1,2,4,5-Cyclohexanetetrol | 1.76 | 0.0439         | 4-O-Feruloylquinic Acid       | 2.13 | 0.0011         |
| 4-O-Feruloylquinic Acid   | 1.73 | 0.0036         | 1,2,4,5-Cyclohexanetetrol     | 1.98 | 0.0228         |
| 4-Methoxycyclohexanol     | 1.72 | 0.0121         | 4-Methoxycyclohexanol         | 1.72 | 0.0121         |
| Shikimic Acid             | 1.32 | 0.0104         | Shikimic Acid                 | 1.33 | 0.0032         |
| Ethylamine                | 2.06 | 0.0002         | Sphingosine                   | 1.18 | 0.0011         |
| Sphingosine               | 1.41 | 0.0002         | Beta-Alanine                  | 1.11 | 0.0027         |
| Cadaverine                | 1.19 | 0.0059         | 1,3-Benzenediol               | 1.05 | 0.0398         |
| Beta-Alanine              | 1.55 | 0.0001         | Hydroxyhydroquinone           | 1.01 | 0.0004         |
| L-Serine                  | 1.09 | 0.0026         | 3-Hydroxybenzoic Acid         | 1.38 | 0.0026         |
| Hydroxyhydroquinone       | 1.05 | 0.0003         | Hydroxypropionic Acid         | 1.16 | 0.0000         |
| 3-Hydroxybenzoic Acid     | 1.34 | 0.0032         | Deoxycholic Acid              | 2.25 | 0.0021         |
| Hydroxypropionic Acid     | 1.24 | 0.0001         | Galactose                     | 1.63 | 0.0106         |
| Deoxycholic Acid          | 1.83 | 0.0053         | D-Gulose                      | 1.58 | 0.0135         |
| Galactitol                | 2.11 | 0.0000         | Maltotriose                   | 1.45 | 0.0002         |
| Galactose 1-Phosphate     | 1.38 | 0.0129         | L-(-)-Sorbose                 | 1.44 | 0.0135         |
| D-Threonic Acid           | 1.38 | 0.0001         | Galactose 1-Phosphate         | 1.33 | 0.0001         |
| Xylitol                   | 1.34 | 0.0003         | Glucose                       | 1.27 | 0.0008         |
| N-Acetylmannosamine       | 1.33 | 0.0001         | Beta-Lactose                  | 1.27 | 0.0011         |
| DI-Glyceric Acid          | 1.12 | 0.0002         | Xylitol                       | 1.27 | 0.0010         |
| L-Fucitol                 | 1.11 | 0.0051         | D-Threonic Acid               | 1.24 | 0.0001         |
| Glucose                   | 1.02 | 0.0095         | 1-Deoxy-D-Glucitol            | 1.16 | 0.0066         |
| Galactaric Acid           | 1.02 | 0.0056         | Methyl-Beta-Galactopyranoside | 1.13 | 0.0253         |
| Glutaric Acid             | 2.07 | 0.0013         | N-Acetylmannosamine           | 1.12 | 0.0005         |
| Pgf2alpha                 | 1.07 | 0.0036         | L-Fucitol                     | 1.09 | 0.0042         |
| 17-Octadecynoic Acid      | 2.38 | 0.0044         | D-Glucose                     | 1.02 | 0.0029         |
| Oleic Acid                | 2.37 | 0.0069         | Glutaric Acid                 | 2.53 | 0.0002         |
| Isopentadecylic Acid      | 2.31 | 0.0061         | Isopentadecylic Acid          | 2.95 | 0.0033         |
| 4-Hydroxybutyric Acid     | 2.12 | 0.0000         | Oleic Acid                    | 2.86 | 0.0044         |
| Margaric Acid             | 2.11 | 0.0050         | 17-Octadecynoic Acid          | 2.37 | 0.0044         |
| Pentadecylic Acid         | 2.05 | 0.0065         | Pentadecylic Acid             | 2.34 | 0.0041         |
| Caproic Acid              | 1.43 | 0.0015         | Margaric Acid                 | 2.10 | 0.0050         |
| Myristic Acid             | 1.34 | 0.0071         | 4-Hydroxybutyric Acid         | 1.68 | 0.0042         |
| Heptylic Acid             | 1.21 | 0.0070         | Itaconic Acid                 | 1.62 | 0.0274         |
| Stearic Acid              | 1.18 | 0.0064         | Caproic Acid                  | 1.54 | 0.0008         |
| Palmitic Acid             | 1.10 | 0.0097         | Myristic Acid                 | 1.42 | 0.0049         |
| Leucrose                  | 1.22 | 0.0115         | Heptylic Acid                 | 1.33 | 0.0031         |
| Lactitol                  | 1.03 | 0.0094         | Stearic Acid                  | 1.32 | 0.0028         |
| 2-Furoic Acid             | 1.62 | 0.0043         | Palmitic Acid                 | 1.23 | 0.0047         |



|                                   |      |        |                                   |      |        |
|-----------------------------------|------|--------|-----------------------------------|------|--------|
| Erythrono-1,4-Lactone             | 1.06 | 0.0010 | Caprylic Acid                     | 1.09 | 0.0016 |
| Indoleacrylic Acid                | 2.22 | 0.0052 | Lactitol                          | 1.16 | 0.0023 |
| Linoelaidic Acid                  | 2.20 | 0.0084 | Cetyl Alcohol                     | 1.02 | 0.0120 |
| 6-Hydroxyhexanoic Acid            | 1.20 | 0.0001 | 2-Furoic Acid                     | 1.61 | 0.0043 |
| Nicotinic Acid                    | 1.58 | 0.0044 | 3-Pyridinol                       | 1.10 | 0.0120 |
| Thymine                           | 1.33 | 0.0032 | Indoleacrylic Acid                | 2.21 | 0.0052 |
| Uracil                            | 1.30 | 0.0002 | Linoelaidic Acid                  | 2.48 | 0.0059 |
| 2-Hydroxyglutaric Acid            | 1.01 | 0.0030 | Nicotinic Acid                    | 1.70 | 0.0027 |
| Galactinol                        | 2.75 | 0.0001 | Thymine                           | 1.56 | 0.0010 |
| Piceatannol                       | 2.12 | 0.0000 | Uracil                            | 1.32 | 0.0002 |
| Ethyl-Alpha-D-Glucopyranoside     | 1.76 | 0.0000 | Ginkgolide A                      | 1.26 | 0.0002 |
| Beta-Mannosylglycerate            | 1.67 | 0.0038 | Galactinol                        | 2.16 | 0.0119 |
| 3-(3-Hydroxyphenyl)Propanoic Acid | 1.56 | 0.0016 | Talose                            | 1.85 | 0.0104 |
| 5,5-Dimethylhydantoin             | 1.50 | 0.0035 | Ethyl-Alpha-D-Glucopyranoside     | 1.77 | 0.0000 |
| 5-Methylimidazolidine-2,4-Dione   | 1.44 | 0.0016 | 3-(3-Hydroxyphenyl)Propanoic Acid | 1.76 | 0.0006 |
| 1-C-Octylhexopyranose             | 1.35 | 0.0002 | 5,5-Dimethylhydantoin             | 1.69 | 0.0016 |
| Mannobiose                        | 1.34 | 0.0076 | 5-Methylimidazolidine-2,4-Dione   | 1.53 | 0.0010 |
| Conduritol-Beta-Epoxide           | 1.21 | 0.0003 | Furfuryl Alcohol                  | 1.36 | 0.0022 |
| Furfuryl Alcohol                  | 1.20 | 0.0046 | Beta-Mannosylglycerate            | 1.33 | 0.0184 |
| 2-Mercaptophenol                  | 1.20 | 0.0009 | Piceatannol                       | 1.32 | 0.0462 |
| Pterostilbene                     | 1.13 | 0.0018 | 2-Mercaptophenol                  | 1.25 | 0.0006 |
| Levorphanol                       | 1.10 | 0.0031 | 5-Methylpyrrolidin-2-One          | 1.25 | 0.0011 |
| Sedoheptulose                     | 1.09 | 0.0009 | Mannobiose                        | 1.07 | 0.0437 |

---
